# Supplementary material for: Ocepeia (Middle Paleocene of Morocco): The Oldest Skull of an Afrotherian Mammal
Source: PubMed Central journal article supplement (PMC3935939; doi:10.1371/journal.pone.0089739), 2014-02-26
Supplement: pone.0089739.s001.pdf [file pone.0089739.s001.pdf]

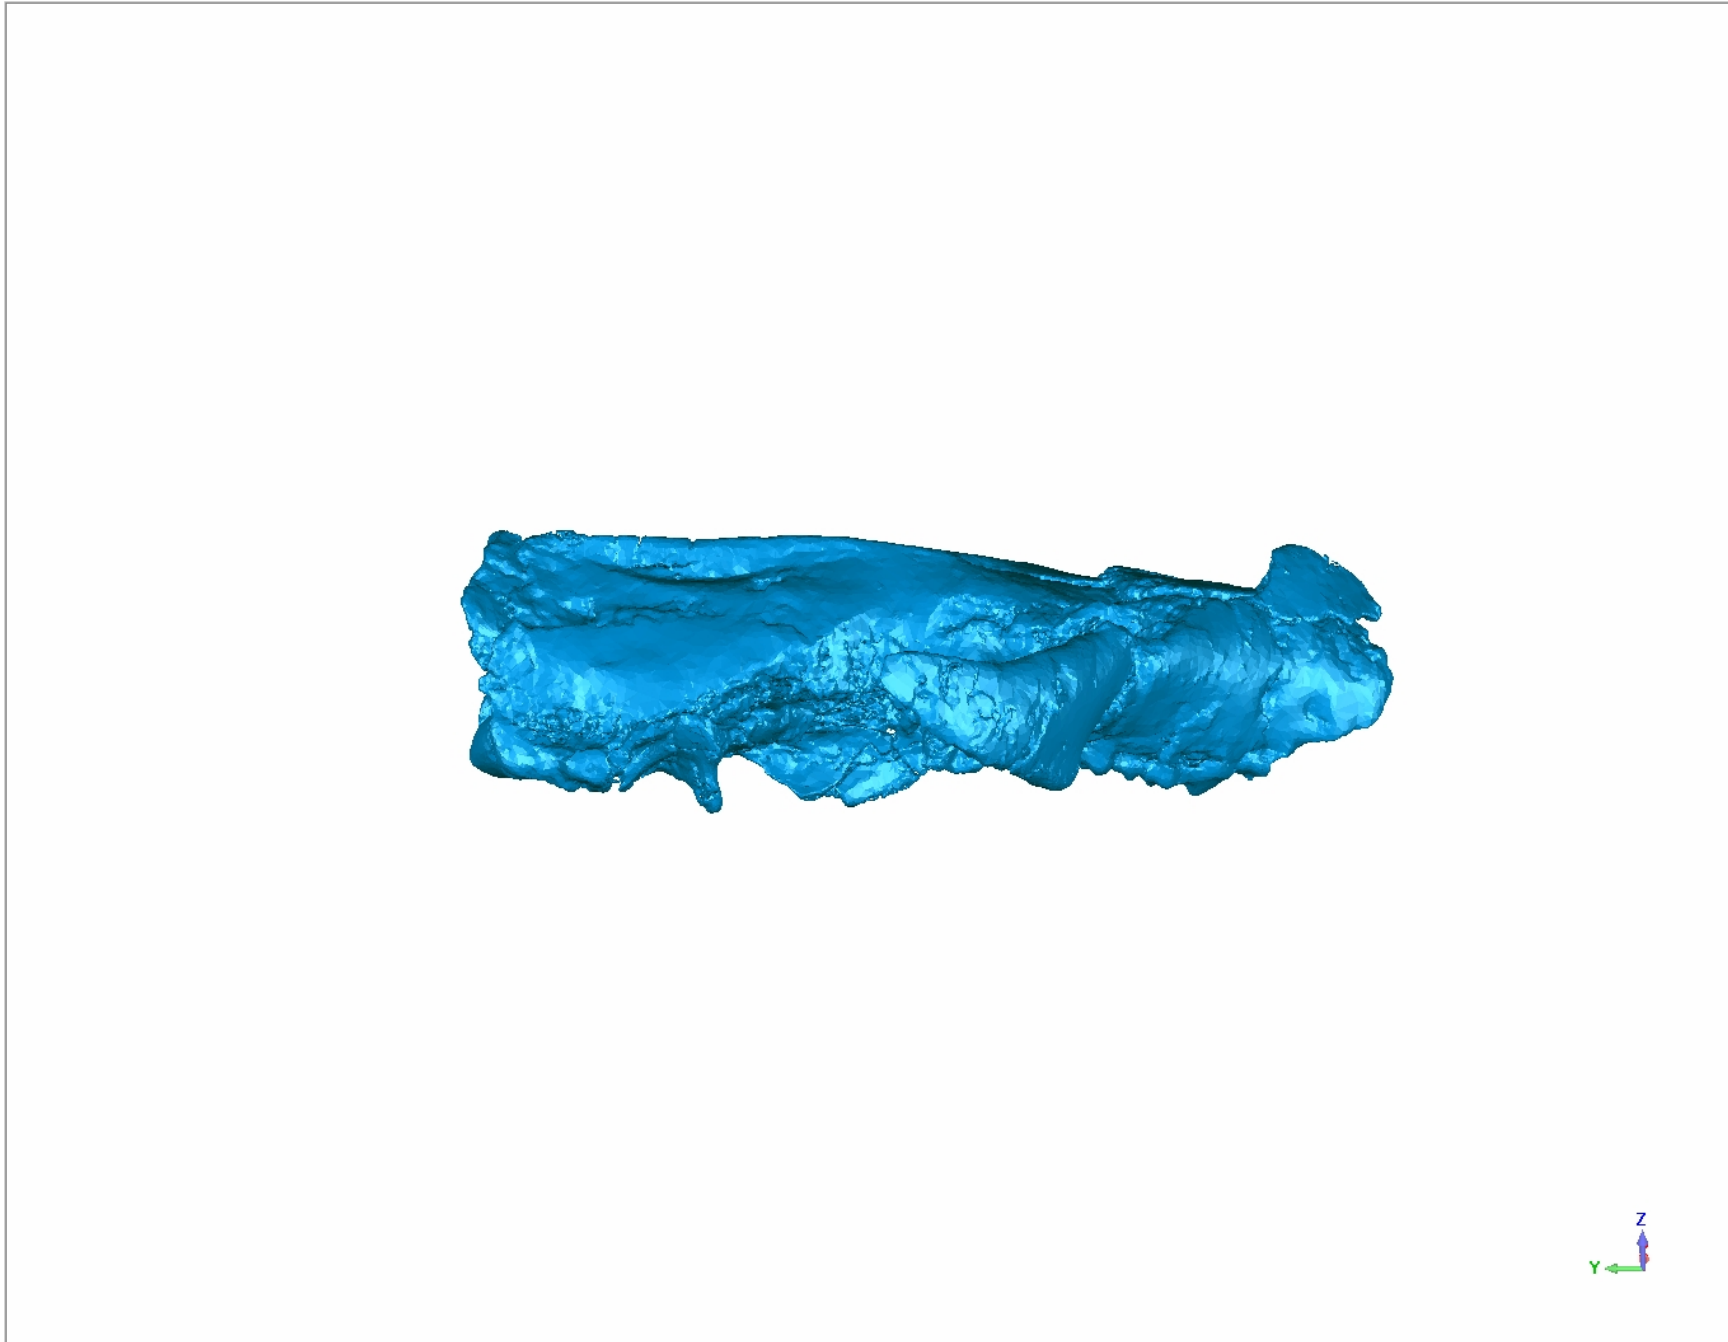

Click on the image to activate the 3D Model.
